# Supplementary material for: Exploring the relationships between physiochemical properties of nanoparticles and cell damage to combat cancer growth using simple periodic table-based descriptors
Source: publisher site journal article supplement (doi:10.3762/bjnano.15.27), 2024-03-12
Supplement: Additional file 2 [file 2190-4286-15-27-S2.pdf]

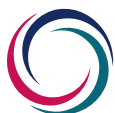

## Supporting Information

for

### **Exploring the relationships between physiochemical properties of nanoparticles and cell damage to combat cancer growth using simple periodic table-based descriptors**

Joyita Roy and Kunal Roy

*Beilstein J. Nanotechnol.* **2024**, *15*, 297–309. [doi:10.3762/bjnano.15.27](https://doi.org/10.3762/bjnano.15.27)

## Additional figures

## SUPPLEMENTARY SECTION (S1)

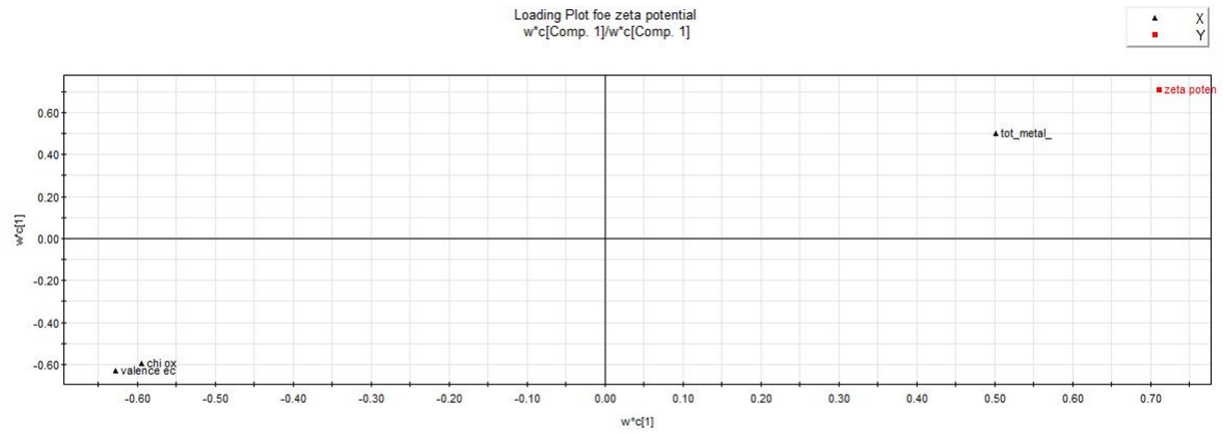

**A**

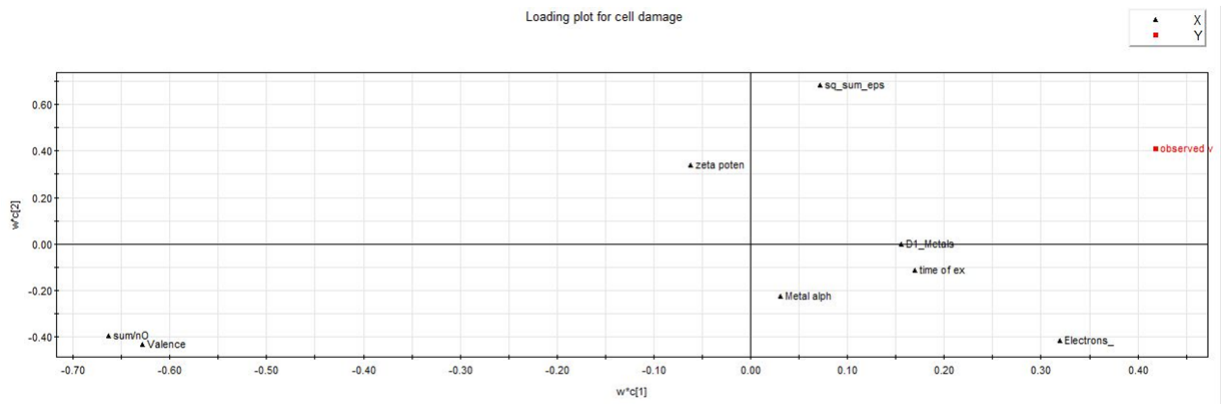

**B**

**Figure S1:** Loading plot of zeta potential data (A) and cell damage dataset (B).

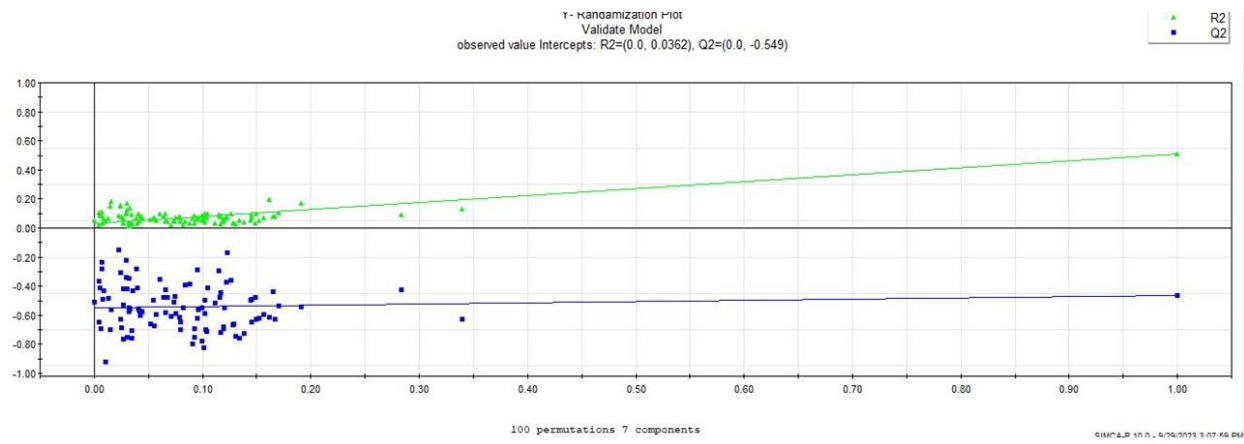

**A**

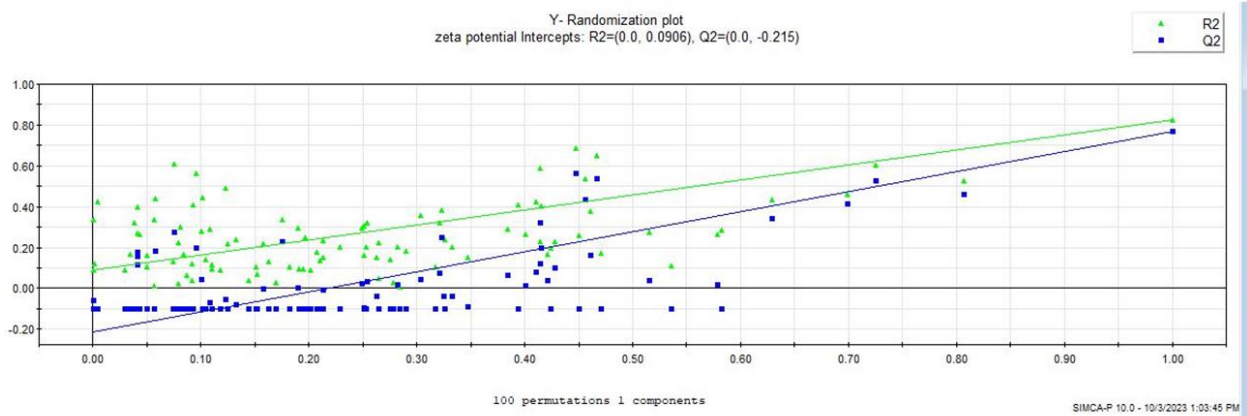

**B**

**Figure S2:** Y-randomization plot of zeta potential data (A) and cell damage dataset (B).
