# Supplementary material for: Exploring the relationships between physiochemical properties of nanoparticles and cell damage to combat cancer growth using simple periodic table-based descriptors
Source: Beilstein J Nanotechnol. 2024 Mar 12;15:297–309. doi: 10.3762/bjnano.15.27 (PMC10949013; doi:10.3762/bjnano.15.27)
Supplement: File 1 — Additional experimental data. [file Beilstein_J_Nanotechnol-15-297-s001.xlsx]

## Sheet: Sheet2
S2- Containing data set related to the present work.
Exploring the relationships between physiochemical properties of nanoparticles and cell damage to combat cancer growth using simple periodic table-based descriptors
Joyita Roya, Kunal Roya*
aDrug Theoretics and Cheminformatics Laboratory,
Department of Pharmaceutical Technology,
Jadavpur University,
Kolkata, 700032, India
*Corresponding author
Prof. Kunal Roy, Phone: +91 98315 94140; Fax: +91-33-2837-1078
Email: kunalroy_in@yahoo.com; kunal.roy@jadavpuruniversity.in;
SUPPLEMENTARY SECTION S2- Data sets

## Sheet: Zeta potential data
sl no	Compound Id	smiles	χox	tot_metal_alpha	valence ectron potential	zeta potential	pred	AD status
1*	2	O=[Bi]O[Bi]=O	3	6.24	41.9	17.1	15.2588	In
2	3	O=[Ce]=O	4	5.6	41.78	17.4	6.41912	In
3	4	O=[Co]O[Co]O[Co]=O	2.66667	12.5	38.7	22.6	31.7198	In
4*	5	O=[Hf]=O	4	7	81	-17.8	1.714	In
5	6	O=[Mn]O[Mn]=O	3	7.66667	220	-15.9	-16.61	In
6	7	O=[Ni]	2	4.33333	42	34.4	18.678	In
7	8	O=[Si]=O	4	1.25	144	-18.7	-22.8815	In
8*	9	O=[Ti]=O	4	3.33333	95.2	-12.2	-8.8792	In
9	10	O=[W](=O)=O	6	7.2	140	-23	-24.424	In
10	12	O=[Zn]	2	4.66667	38.9	13.9	19.9956	In
11	13	O=[Zr]=O	4	4.75	80	-2	-2.8825	In
12	14	O=[Fe]O[Fe]=O	3	8	67	4.2	14.088	In
13	15	O=[Gd]O[Gd]=O	3	12.4	46.1	19.3	27.5564	In
14*	17	O=[La]O[La]=O	3	11	40.71	25.4	25.6308	In
15	18	O=[Sb]O[Sb]=O	3	4.6	57	5.4	8.806	In
16	19	O=[Sn]=O	4	2.875	83.5	-20.5	-7.56225	In
17	20	O=[Yb]O[Yb]=O	3	13.6	50.3	46	29.2892	In
18*	21	O=[Cr]O[Cr]=O	3	15.3333	170	2.2	9.52	In

## Sheet: Cell damage data
sl no	Compound Id	Metal oxide	dose	time of exposure	Mol_wt	Nmetal	Noxygen	χ	∑χ	∑χ/nO	χox	Z_metal	Zv_metal	PN_metal	(Z-Zv)/Zv_metal	1/(PN-1)_metal	Valence	Metal alpha	tot_metal_alpha	tot_oxygen_alpha	sum aplha	metal_epsilon	sum_epsilon	sum_epsilon/N	squared_sum alpha	sq_sum_epsilon/N	D1_Metals	D3_HeteroNonMetals	Metals_SumIP	Electrons_ActiveM	AtWt_ActiveM	MassNo_ActiveM	Neutons_ActiveM	IP_ActivM	X_ActivM	SuM_Active_M_SM	SuMElectrons_Active_M_SM	SuMAtWt_Active_M_SM	SuMMassNo_Active_M_SM	SuMNeutons_Active_M_SM	atomic radius	eletrochemical equivalent	covalent radius	Valence Electron Potential	Heat of Fusion	observed value	AD status
1	1	ZrO2	200	7	123.222	1	2	1.33	1.33	0.665	4	40	2	5	19	0.25	4	4.75	4.75	0.66	5.41	-4.15	-2.68	-0.893333	29.2681	0.798044	1	2	669	40	91.224	91	51	669	1.2	1	40	91.224	91	51	2.16	0.8509	1.57	80	16.9	-3	In
2	*5	YY.O3	200	1	225.809	2	3	1.22	2.44	0.813333	3	39	2	5	18.5	0.25	3	4.625	9.25	0.99	10.24	-4.025	-2.555	-0.511	104.858	0.261121	2	3	1252	39	88.9058	89	50	626	1.2	2	39	88.9058	89	50	2.27	1.1057	1.62	48	11.4	-2.75	In
3	6	YY.O3	200	3	225.809	2	3	1.22	2.44	0.813333	3	39	2	5	18.5	0.25	3	4.625	9.25	0.99	10.24	-4.025	-2.555	-0.511	104.858	0.261121	2	3	1252	39	88.9058	89	50	626	1.2	2	39	88.9058	89	50	2.27	1.1057	1.62	48	11.4	-3	Out
4	7	YY.O3	200	5	225.809	2	3	1.22	2.44	0.813333	3	39	2	5	18.5	0.25	3	4.625	9.25	0.99	10.24	-4.025	-2.555	-0.511	104.858	0.261121	2	3	1252	39	88.9058	89	50	626	1.2	2	39	88.9058	89	50	2.27	1.1057	1.62	48	11.4	-3	In
5	8	YY.O3	200	6	225.809	2	3	1.22	2.44	0.813333	3	39	2	5	18.5	0.25	3	4.625	9.25	0.99	10.24	-4.025	-2.555	-0.511	104.858	0.261121	2	3	1252	39	88.9058	89	50	626	1.2	2	39	88.9058	89	50	2.27	1.1057	1.62	48	11.4	-3.125	In
6	9	YY.O3	200	7	225.809	2	3	1.22	2.44	0.813333	3	39	2	5	18.5	0.25	3	4.625	9.25	0.99	10.24	-4.025	-2.555	-0.511	104.858	0.261121	2	3	1252	39	88.9058	89	50	626	1.2	2	39	88.9058	89	50	2.27	1.1057	1.62	48	11.4	-3	In
7	10	TiO2	200	7	79.865	1	2	1.54	1.54	0.77	4	22	2	4	10	0.333333	4	3.33333	3.33333	0.66	3.99333	-2.73333	-1.26333	-0.421111	15.9467	0.177335	1	2	658	22	47.867	48	26	658	1.5	1	22	47.867	48	26	2	0.4468	1.32	95.2	15.45	-2.875	In
8	11	SnO2	200	4	150.708	1	2	1.96	1.96	0.98	4	50	4	5	11.5	0.25	4	2.875	2.875	0.66	3.535	-1.675	-0.205	-0.0683333	12.4962	0.00466944	1	2	708.4	50	118.71	119	69	708.4	1.8	1	50	118.71	119	69	1.72	1.1071	1.41	83.5	7.029	-3	In
9	*12	SnO2	200	5	150.708	1	2	1.96	1.96	0.98	4	50	4	5	11.5	0.25	4	2.875	2.875	0.66	3.535	-1.675	-0.205	-0.0683333	12.4962	0.00466944	1	2	708.4	50	118.71	119	69	708.4	1.8	1	50	118.71	119	69	1.72	1.1071	1.41	83.5	7.029	-3	In
10	13	SnO2	200	6	150.708	1	2	1.96	1.96	0.98	4	50	4	5	11.5	0.25	4	2.875	2.875	0.66	3.535	-1.675	-0.205	-0.0683333	12.4962	0.00466944	1	2	708.4	50	118.71	119	69	708.4	1.8	1	50	118.71	119	69	1.72	1.1071	1.41	83.5	7.029	-3.125	In
11	14	SiO2	200	2	60.083	1	2	1.9	1.9	0.95	4	14	4	3	2.5	0.5	4	1.25	1.25	0.66	1.91	-0.05	1.42	0.473333	3.6481	0.224044	0	2	0	0	0	0	0	0	0	1	14	28.085	28	14	1.46	0.26197	1.11	144	50.55	-3.25	In
12	15	SiO2	200	3	60.083	1	2	1.9	1.9	0.95	4	14	4	3	2.5	0.5	4	1.25	1.25	0.66	1.91	-0.05	1.42	0.473333	3.6481	0.224044	0	2	0	0	0	0	0	0	0	1	14	28.085	28	14	1.46	0.26197	1.11	144	50.55	-3.125	In
13	*16	SiO2	200	4	60.083	1	2	1.9	1.9	0.95	4	14	4	3	2.5	0.5	4	1.25	1.25	0.66	1.91	-0.05	1.42	0.473333	3.6481	0.224044	0	2	0	0	0	0	0	0	0	1	14	28.085	28	14	1.46	0.26197	1.11	144	50.55	-3.125	In
14	17	SiO2	200	5	60.083	1	2	1.9	1.9	0.95	4	14	4	3	2.5	0.5	4	1.25	1.25	0.66	1.91	-0.05	1.42	0.473333	3.6481	0.224044	0	2	0	0	0	0	0	0	0	1	14	28.085	28	14	1.46	0.26197	1.11	144	50.55	-3.125	In
15	18	SiO2	200	7	60.083	1	2	1.9	1.9	0.95	4	14	4	3	2.5	0.5	4	1.25	1.25	0.66	1.91	-0.05	1.42	0.473333	3.6481	0.224044	0	2	0	0	0	0	0	0	0	1	14	28.085	28	14	1.46	0.26197	1.11	144	50.55	-2.875	In
16	19	SbSbO3	200	2	291.517	2	3	2.05	4.1	1.36667	3	51	5	5	9.2	0.25	5	2.3	4.6	0.99	5.59	-0.8	0.67	0.134	31.2481	0.017956	2	3	1078	57	138.91	139	82	539	1.1	2	57	138.91	139	82	2.74	1.7275	1.69	40.71	6.2	-3.125	In
17	20	SbSbO3	200	4	291.517	2	3	2.05	4.1	1.36667	3	51	5	5	9.2	0.25	5	2.3	4.6	0.99	5.59	-0.8	0.67	0.134	31.2481	0.017956	2	3	1078	57	138.91	139	82	539	1.1	2	57	138.91	139	82	2.74	1.7275	1.69	40.71	6.2	-2.875	In
18	*21	SbSbO3	200	7	291.517	2	3	2.05	4.1	1.36667	3	51	5	5	9.2	0.25	5	2.3	4.6	0.99	5.59	-0.8	0.67	0.134	31.2481	0.017956	2	3	1078	57	138.91	139	82	539	1.1	2	57	138.91	139	82	2.74	1.7275	1.69	40.71	6.2	-3.125	In
19	*22	LaLa.O3	200	7	325.808	2	3	1.1	2.2	0.733333	3	57	2	6	27.5	0.2	3	5.5	11	0.99	11.99	-4.9	-3.43	-0.686	143.76	0.470596	2	3	1078	57	138.91	139	82	539	1.1	2	57	138.91	139	82	2.74	1.7275	1.69	40.71	6.2	-2.625	In
20	23	HfO2	200	6	210.488	1	2	1.3	1.3	0.65	4	72	2	6	35	0.2	4	7	7	0.66	7.66	-6.4	-4.93	-1.64333	58.6756	2.70054	2	3	1078	57	138.91	139	82	539	1.1	2	57	138.91	139	82	2.74	1.7275	1.69	40.71	6.2	-2.875	In
21	24	GdGd.O3	200	2	362.497	2	3	1.2	2.4	0.8	3	64	2	6	31	0.2	3	6.2	12.4	0.99	13.39	-5.6	-4.13	-0.826	179.292	0.682276	2	3	1182.8	64	157.25	157	93	591.4	1.1	2	64	157.25	157	93	2.54	1.9557	1.61	46.1	10.05	-3	In
22	25	GdGd.O3	200	3	362.497	2	3	1.2	2.4	0.8	3	64	2	6	31	0.2	3	6.2	12.4	0.99	13.39	-5.6	-4.13	-0.826	179.292	0.682276	2	3	1182.8	64	157.25	157	93	591.4	1.1	2	64	157.25	157	93	2.54	1.9557	1.61	46.1	10.05	-3.05	In
23	26	GdGd.O3	200	4	362.497	2	3	1.2	2.4	0.8	3	64	2	6	31	0.2	3	6.2	12.4	0.99	13.39	-5.6	-4.13	-0.826	179.292	0.682276	2	3	1182.8	64	157.25	157	93	591.4	1.1	2	64	157.25	157	93	2.54	1.9557	1.61	46.1	10.05	-3.125	In
24	27	GdGd.O3	200	5	362.497	2	3	1.2	2.4	0.8	3	64	2	6	31	0.2	3	6.2	12.4	0.99	13.39	-5.6	-4.13	-0.826	179.292	0.682276	2	3	1182.8	64	157.25	157	93	591.4	1.1	2	64	157.25	157	93	2.54	1.9557	1.61	46.1	10.05	-3.125	In
25	*28	GdGd.O3	200	6	362.497	2	3	1.2	2.4	0.8	3	64	2	6	31	0.2	3	6.2	12.4	0.99	13.39	-5.6	-4.13	-0.826	179.292	0.682276	2	3	1182.8	64	157.25	157	93	591.4	1.1	2	64	157.25	157	93	2.54	1.9557	1.61	46.1	10.05	-3	In
26	29	GdGd.O3	200	7	362.497	2	3	1.2	2.4	0.8	3	64	2	6	31	0.2	3	6.2	12.4	0.99	13.39	-5.6	-4.13	-0.826	179.292	0.682276	2	3	1182.8	64	157.25	157	93	591.4	1.1	2	64	157.25	157	93	2.54	1.9557	1.61	46.1	10.05	-2.75	In
27	30	FeFe.Fe.O4	200	2	231.531	3	3	1.83	5.49	1.3725	2.66667	26	2	4	12	0.333333	6	4	12	1.32	13.32	-3.4	-1.93	-0.275714	177.422	0.0760184	3	4	2283	26	55.845	56	30	761	1.8	3	26	55.845	56	30	1.72	0.69455	1.32	67	13.8	-2.875	In
28	31	FeFe.Fe.O4	200	5	231.531	3	3	1.83	5.49	1.3725	2.66667	26	2	4	12	0.333333	6	4	12	1.32	13.32	-3.4	-1.93	-0.275714	177.422	0.0760184	3	4	2283	26	55.845	56	30	761	1.8	3	26	55.845	56	30	1.72	0.69455	1.32	67	13.8	-3.5	In
29	32	CuO	200	1	79.545	1	1	1.9	1.9	1.9	2	29	1	4	28	0.333333	4	9.33333	9.33333	0.33	9.66333	-9.03333	-7.56333	-3.78167	93.38	14.301	1	1	743.5	29	63.546	64	35	743.5	1.9	1	29	63.546	64	35	1.57	1.1855	1.17	34	13.05	-3.125	In
30	33	CrCr.O3	200	1	151.989	2	3	1.66	3.32	1.10667	3	24	1	4	23	0.333333	6	7.66667	15.3333	0.99	16.3233	-7.36667	-5.89667	-1.17933	266.451	1.39083	2	3	1302.2	24	51.996	52	28	651.1	1.6	2	24	51.996	52	28	1.85	0.32333	1.18	170	16.9	-2.875	In
31	34	CrCr.O3	200	2	151.989	2	3	1.66	3.32	1.10667	3	24	1	4	23	0.333333	6	7.66667	15.3333	0.99	16.3233	-7.36667	-5.89667	-1.17933	266.451	1.39083	2	3	1302.2	24	51.996	52	28	651.1	1.6	2	24	51.996	52	28	1.85	0.32333	1.18	170	16.9	-3	In
32	36	CoO	200	5	74.932	1	1	1.88	1.88	1.88	2	27	2	4	12.5	0.333333	5	4.16667	4.16667	0.33	4.49667	-3.56667	-2.09667	-1.04833	20.22	1.099	1	1	757	27	58.933	59	32	757	1.8	1	27	58.933	59	32	1.67	1.0994	1.16	38.7	16.19	-4.375	In
33	*37	CoO	200	7	74.932	1	1	1.88	1.88	1.88	2	27	2	4	12.5	0.333333	5	4.16667	4.16667	0.33	4.49667	-3.56667	-2.09667	-1.04833	20.22	1.099	1	1	757	27	58.933	59	32	757	1.8	1	27	58.933	59	32	1.67	1.0994	1.16	38.7	16.19	-5	In
34	38	CoCo.Co.O4	200	6	240.796	3	4	1.88	5.64	1.41	2.66667	27	2	4	12.5	0.333333	5	4.16667	12.5	1.32	13.82	-3.56667	-2.09667	-0.299524	190.992	0.0897145	3	4	2271	27	58.933	59	32	757	1.8	3	27	58.933	59	32	1.67	1.0994	1.16	38.7	16.19	-3	Out
35	39	CeO2	200	4	172.114	1	2	1.12	1.12	0.56	4	58	2	6	28	0.2	4	5.6	5.6	0.66	6.26	-5	-3.53	-1.17667	39.1876	1.38454	1	2	526.8	58	140.12	140	82	526.8	1.1	1	58	140.12	140	82	2.7	1.7426	1.65	41.78	5.46	-4.5	Out
36	40	YbYb.O3	150	6	394.08	2	3	1.1	2.2	0.733333	3	70	2	6	34	0.2	3	6.8	13.6	0.99	14.59	-6.2	-4.73	-0.946	212.868	0.894916	2	3	1204.8	70	173.05	173	103	602.4	1.1	2	70	173.05	173	103	2.4	2.152	1.74	50.3	7.66	-2.875	In
37	41	YbYb.O3	150	7	394.08	2	3	1.1	2.2	0.733333	3	70	2	6	34	0.2	3	6.8	13.6	0.99	14.59	-6.2	-4.73	-0.946	212.868	0.894916	2	3	1204.8	70	173.05	173	103	602.4	1.1	2	70	173.05	173	103	2.4	2.152	1.74	50.3	7.66	-2.875	In
38	42	YY.O3	150	2	225.809	2	3	1.22	2.44	0.813333	3	39	2	5	18.5	0.25	3	4.625	9.25	0.99	10.24	-4.025	-2.555	-0.511	104.858	0.261121	2	3	1252	39	88.9058	89	50	626	1.2	2	39	88.9058	89	50	2.27	1.1057	1.62	48	11.4	-3	In
39	43	YY..O3	150	5	225.809	2	3	1.22	2.44	0.813333	3	39	2	5	18.5	0.25	3	4.625	9.25	0.99	10.24	-4.025	-2.555	-0.511	104.858	0.261121	2	3	1252	39	88.9058	89	50	626	1.2	2	39	88.9058	89	50	2.27	1.1057	1.62	48	11.4	-2.75	In
40	44	YY.O4	150	7	225.809	2	3	1.22	2.44	0.813333	3	39	2	5	18.5	0.25	3	4.625	9.25	0.99	10.24	-4.025	-2.555	-0.511	104.858	0.261121	2	3	1252	39	88.9058	89	50	626	1.2	2	39	88.9058	89	50	2.27	1.1057	1.62	48	11.4	-3.125	In
41	*45	WO3	150	1	231.84	1	3	2.36	2.36	0.786667	6	74	2	6	36	0.2	6	7.2	7.2	0.99	8.19	-6.6	-5.13	-1.2825	67.0761	1.64481	1	3	768.6	74	183.84	184	110	768.6	1.7	1	74	183.84	184	110	2.02	1.1432	1.3	140	35.4	-3.125	In
42	46	WO3	150	2	231.84	1	3	2.36	2.36	0.786667	6	74	2	6	36	0.2	6	7.2	7.2	0.99	8.19	-6.6	-5.13	-1.2825	67.0761	1.64481	1	3	768.6	74	183.84	184	110	768.6	1.7	1	74	183.84	184	110	2.02	1.1432	1.3	140	35.4	-3.5	In
43	47	WO3	150	6	231.84	1	3	2.36	2.36	0.786667	6	74	2	6	36	0.2	6	7.2	7.2	0.99	8.19	-6.6	-5.13	-1.2825	67.0761	1.64481	1	3	768.6	74	183.84	184	110	768.6	1.7	1	74	183.84	184	110	2.02	1.1432	1.3	140	35.4	-4.575	In
44	48	WO3	150	7	231.84	1	3	2.36	2.36	0.786667	6	74	2	6	36	0.2	6	7.2	7.2	0.99	8.19	-6.6	-5.13	-1.2825	67.0761	1.64481	1	3	768.6	74	183.84	184	110	768.6	1.7	1	74	183.84	184	110	2.02	1.1432	1.3	140	35.4	-3	In
45	49	SnO2	150	2	150.708	1	2	1.96	1.96	0.98	4	50	4	5	11.5	0.25	4	2.875	2.875	0.66	3.535	-1.675	-0.205	-0.0683333	12.4962	0.00466944	1	2	708.4	50	118.71	119	69	708.4	1.8	1	50	118.71	119	69	1.72	1.1071	1.41	83.5	7.029	-3.25	In
46	50	SnO2	150	3	150.708	1	2	1.96	1.96	0.98	4	50	4	5	11.5	0.25	4	2.875	2.875	0.66	3.535	-1.675	-0.205	-0.0683333	12.4962	0.00466944	1	2	708.4	50	118.71	119	69	708.4	1.8	1	50	118.71	119	69	1.72	1.1071	1.41	83.5	7.029	-3.125	In
47	51	SnO2	150	4	150.708	1	2	1.96	1.96	0.98	4	50	4	5	11.5	0.25	4	2.875	2.875	0.66	3.535	-1.675	-0.205	-0.0683333	12.4962	0.00466944	1	2	708.4	50	118.71	119	69	708.4	1.8	1	50	118.71	119	69	1.72	1.1071	1.41	83.5	7.029	-3.125	In
48	52	SnO2	150	7	150.708	1	2	1.96	1.96	0.98	4	50	4	5	11.5	0.25	4	2.875	2.875	0.66	3.535	-1.675	-0.205	-0.0683333	12.4962	0.00466944	1	2	708.4	50	118.71	119	69	708.4	1.8	1	50	118.71	119	69	1.72	1.1071	1.41	83.5	7.029	-3.125	In
49	53	SiO2	150	6	60.083	1	2	1.9	1.9	0.95	4	14	4	3	2.5	0.5	4	1.25	1.25	0.66	1.91	-0.05	1.42	0.473333	3.6481	0.224044	0	2	0	0	0	0	0	0	0	1	14	28.085	28	14	1.46	0.26197	1.11	144	50.55	-3	In
50	54	SiO2	150	7	60.083	1	2	1.9	1.9	0.95	4	14	4	3	2.5	0.5	4	1.25	1.25	0.66	1.91	-0.05	1.42	0.473333	3.6481	0.224044	0	2	0	0	0	0	0	0	0	1	14	28.085	28	14	1.46	0.26197	1.11	144	50.55	-3.125	In
51	55	SbSbO3	150	1	291.517	2	3	2.05	4.1	1.36667	3	51	5	5	9.2	0.25	5	2.3	4.6	0.99	5.59	-0.8	0.67	0.134	31.2481	0.017956	0	2	0	0	0	0	0	0	0	1	14	28.085	28	14	1.46	0.26197	1.11	144	50.55	-4.625	In
52	56	SbSb.O3	150	2	291.517	2	3	2.05	4.1	1.36667	3	51	5	5	9.2	0.25	5	2.3	4.6	0.99	5.59	-0.8	0.67	0.134	31.2481	0.017956	0	2	0	0	0	0	0	0	0	1	14	28.085	28	14	1.46	0.26197	1.11	144	50.55	-4.375	In
53	57	NiO	150	3	74.692	1	1	1.91	1.91	1.91	2	28	2	4	13	0.333333	4	4.33333	4.33333	0.33	4.66333	-3.73333	-2.26333	-1.13167	21.7467	1.28067	1	1	735	28	58.6934	59	31	735	1.8	1	28	58.6934	59	31	1.62	1.095	1.15	42	17.47	-3.575	In
54	58	GdGd.O3	150	7	362.497	2	3	1.2	2.4	0.8	3	64	2	6	31	0.2	3	6.2	12.4	0.99	13.39	-5.6	-4.13	-0.826	179.292	0.682276	2	3	1182.8	64	157.25	157	93	591.4	1.1	2	64	157.25	157	93	2.54	1.9557	1.61	46.1	10.05	-3.55	In
55	59	FeFe.Fe..O4	150	7	231.531	3	3	1.83	5.49	1.3725	2.66667	26	2	4	12	0.333333	6	4	12	1.32	13.32	-3.4	-1.93	-0.275714	177.422	0.0760184	3	4	2283	26	55.845	56	30	761	1.8	3	26	55.845	56	30	1.72	0.69455	1.32	67	13.8	-3.125	In
56	60	FeFe..O3	150	7	159.687	2	3	1.83	3.66	1.22	3	26	2	4	12	0.333333	6	4	8	0.99	8.99	-3.4	-1.93	-0.386	80.8201	0.148996	2	3	1522	26	55.845	56	30	761	1.8	2	26	55.845	56	30	1.72	0.69455	1.17	67	13.8	-4.75	In
57	61	CuO	150	6	79.545	1	1	1.9	1.9	1.9	2	29	1	4	28	0.333333	4	9.33333	9.33333	0.33	9.66333	-9.03333	-7.56333	-3.78167	93.38	14.301	1	1	743.5	29	63.546	64	35	743.5	1.9	1	29	63.546	64	35	1.57	1.1855	1.17	34	13.05	-2.875	In
58	62	CuO	150	1	79.545	1	1	1.9	1.9	1.9	2	29	1	4	28	0.333333	4	9.33333	9.33333	0.33	9.66333	-9.03333	-7.56333	-3.78167	93.38	14.301	1	1	743.5	29	63.546	64	35	743.5	1.9	1	29	63.546	64	35	1.57	1.1855	1.17	34	13.05	-3	In
59	63	CuO	150	2	79.545	1	1	1.9	1.9	1.9	2	29	1	4	28	0.333333	4	9.33333	9.33333	0.33	9.66333	-9.03333	-7.56333	-3.78167	93.38	14.301	1	1	743.5	29	63.546	64	35	743.5	1.9	1	29	63.546	64	35	1.57	1.1855	1.17	34	13.05	-1.5	In
60	64	CrCr.O3	150	5	151.989	2	3	1.66	3.32	1.10667	3	24	1	4	23	0.333333	6	7.66667	15.3333	0.99	16.3233	-7.36667	-5.89667	-1.17933	266.451	1.39083	2	3	1302.2	24	51.996	52	28	651.1	1.6	2	24	51.996	52	28	1.85	0.32333	1.18	170	16.9	-3.875	In
61	65	ZrO2	100	2	123.222	1	2	1.33	1.33	0.665	4	40	2	5	19	0.25	4	4.75	4.75	0.66	5.41	-4.15	-2.68	-0.893333	29.2681	0.798044	1	2	669	40	91.224	91	51	669	1.2	1	40	91.224	91	51	2.16	0.8509	1.57	80	16.9	-3.125	In
62	66	ZrO2	100	2	123.222	1	2	1.33	1.33	0.665	4	40	2	5	19	0.25	4	4.75	4.75	0.66	5.41	-4.15	-2.68	-0.893333	29.2681	0.798044	1	2	669	40	91.224	91	51	669	1.2	1	40	91.224	91	51	2.16	0.8509	1.57	80	16.9	-3.125	In
63	67	ZrO2	100	3	123.222	1	2	1.33	1.33	0.665	4	40	2	5	19	0.25	4	4.75	4.75	0.66	5.41	-4.15	-2.68	-0.893333	29.2681	0.798044	1	2	669	40	91.224	91	51	669	1.2	1	40	91.224	91	51	2.16	0.8509	1.57	80	16.9	-3	In
64	68	ZrO2	100	6	123.222	1	2	1.33	1.33	0.665	4	40	2	5	19	0.25	4	4.75	4.75	0.66	5.41	-4.15	-2.68	-0.893333	29.2681	0.798044	1	2	669	40	91.224	91	51	669	1.2	1	40	91.224	91	51	2.16	0.8509	1.57	80	16.9	-3	In
65	69	YbYb.O3	100	7	394.08	2	3	1.1	2.2	0.733333	3	70	2	6	34	0.2	3	6.8	13.6	0.99	14.59	-6.2	-4.73	-0.946	212.868	0.894916	2	3	1204.8	70	173.05	173	103	602.4	1.1	2	70	173.05	173	103	2.4	2.152	1.74	50.3	7.66	-2.875	In
66	*70	YY.O3	100	7	225.809	2	3	1.22	2.44	0.813333	3	39	2	5	18.5	0.25	3	4.625	9.25	0.99	10.24	-4.025	-2.555	-0.511	104.858	0.261121	2	3	1252	39	88.9058	89	50	626	1.2	2	39	88.9058	89	50	2.27	1.1057	1.62	48	11.4	-2.875	In
67	71	WO3	100	7	231.84	1	3	2.36	2.36	0.786667	6	74	2	6	36	0.2	6	7.2	7.2	0.99	8.19	-6.6	-5.13	-1.2825	67.0761	1.64481	1	3	768.6	74	183.84	184	110	768.6	1.7	1	74	183.84	184	110	2.02	1.1432	1.3	140	35.4	-4.5	In
68	72	WO3	100	6	231.84	1	3	2.36	2.36	0.786667	6	74	2	6	36	0.2	6	7.2	7.2	0.99	8.19	-6.6	-5.13	-1.2825	67.0761	1.64481	1	3	768.6	74	183.84	184	110	768.6	1.7	1	74	183.84	184	110	2.02	1.1432	1.3	140	35.4	-3	In
69	73	TiO2	100	7	79.865	1	2	1.54	1.54	0.77	4	22	2	4	10	0.333333	4	3.33333	3.33333	0.66	3.99333	-2.73333	-1.26333	-0.421111	15.9467	0.177335	1	2	658	22	47.867	48	26	658	1.5	1	22	47.867	48	26	2	0.4468	1.32	95.2	15.45	-3	In
70	*74	TiO2	100	2	79.865	1	2	1.54	1.54	0.77	4	22	2	4	10	0.333333	4	3.33333	3.33333	0.66	3.99333	-2.73333	-1.26333	-0.421111	15.9467	0.177335	1	2	658	22	47.867	48	26	658	1.5	1	22	47.867	48	26	2	0.4468	1.32	95.2	15.45	-2.875	In
71	75	TiO2	100	3	79.865	1	2	1.54	1.54	0.77	4	22	2	4	10	0.333333	4	3.33333	3.33333	0.66	3.99333	-2.73333	-1.26333	-0.421111	15.9467	0.177335	1	2	658	22	47.867	48	26	658	1.5	1	22	47.867	48	26	2	0.4468	1.32	95.2	15.45	-2.875	In
72	76	TiO2	100	4	79.865	1	2	1.54	1.54	0.77	4	22	2	4	10	0.333333	4	3.33333	3.33333	0.66	3.99333	-2.73333	-1.26333	-0.421111	15.9467	0.177335	1	2	658	22	47.867	48	26	658	1.5	1	22	47.867	48	26	2	0.4468	1.32	95.2	15.45	-2.875	In
73	77	TiO2	100	6	79.865	1	2	1.54	1.54	0.77	4	22	2	4	10	0.333333	4	3.33333	3.33333	0.66	3.99333	-2.73333	-1.26333	-0.421111	15.9467	0.177335	1	2	658	22	47.867	48	26	658	1.5	1	22	47.867	48	26	2	0.4468	1.32	95.2	15.45	-2.5	In
74	*78	SnO2	100	7	150.708	1	2	1.96	1.96	0.98	4	50	4	5	11.5	0.25	4	2.875	2.875	0.66	3.535	-1.675	-0.205	-0.0683333	12.4962	0.00466944	1	2	708.4	50	118.71	119	69	708.4	1.8	1	50	118.71	119	69	1.72	1.1071	1.41	83.5	7.029	-3	In
75	79	SiO2	100	7	60.083	1	2	1.9	1.9	0.95	4	14	4	3	2.5	0.5	4	1.25	1.25	0.66	1.91	-0.05	1.42	0.473333	3.6481	0.224044	0	2	0	0	0	0	0	0	0	1	14	28.085	28	14	1.46	0.26197	1.11	144	50.55	-3.125	In
76	80	NiO	100	7	74.692	1	1	1.91	1.91	1.91	2	28	2	4	13	0.333333	4	4.33333	4.33333	0.33	4.66333	-3.73333	-2.26333	-1.13167	21.7467	1.28067	1	1	735	28	58.6934	59	31	735	1.8	1	28	58.6934	59	31	1.62	1.095	1.15	42	17.47	-3.55	In
77	*81	NiO	100	1	74.692	1	1	1.91	1.91	1.91	2	28	2	4	13	0.333333	4	4.33333	4.33333	0.33	4.66333	-3.73333	-2.26333	-1.13167	21.7467	1.28067	1	1	735	28	58.6934	59	31	735	1.8	1	28	58.6934	59	31	1.62	1.095	1.15	42	17.47	-3.8	In
78	82	NiO	100	3	74.692	1	1	1.91	1.91	1.91	2	28	2	4	13	0.333333	4	4.33333	4.33333	0.33	4.66333	-3.73333	-2.26333	-1.13167	21.7467	1.28067	1	1	735	28	58.6934	59	31	735	1.8	1	28	58.6934	59	31	1.62	1.095	1.15	42	17.47	-4.5	In
79	83	NiO	100	4	74.692	1	1	1.91	1.91	1.91	2	28	2	4	13	0.333333	4	4.33333	4.33333	0.33	4.66333	-3.73333	-2.26333	-1.13167	21.7467	1.28067	1	1	735	28	58.6934	59	31	735	1.8	1	28	58.6934	59	31	1.62	1.095	1.15	42	17.47	-4.75	In
80	84	NiO	100	5	74.692	1	1	1.91	1.91	1.91	2	28	2	4	13	0.333333	4	4.33333	4.33333	0.33	4.66333	-3.73333	-2.26333	-1.13167	21.7467	1.28067	1	1	735	28	58.6934	59	31	735	1.8	1	28	58.6934	59	31	1.62	1.095	1.15	42	17.47	-4.875	In
81	85	InIn.O3	100	6	277.633	2	3	1.78	3.56	1.18667	3	49	3	5	15.3333	0.25	3	3.83333	7.66667	0.99	8.65667	-2.93333	-1.46333	-0.292667	74.9379	0.0856538	2	3	1116.4	49	114.818	115	66	558.2	2	2	49	114.818	115	66	2	1.428	1.44	54	3.263	-3	In
82	86	InIn.O3	100	2	277.633	2	3	1.78	3.56	1.18667	3	49	3	5	15.3333	0.25	3	3.83333	7.66667	0.99	8.65667	-2.93333	-1.46333	-0.292667	74.9379	0.0856538	2	3	1116.4	49	114.818	115	66	558.2	2	2	49	114.818	115	66	2	1.428	1.44	54	3.263	-3.125	In
83	*87	InIn.O3	100	3	277.633	2	3	1.78	3.56	1.18667	3	49	3	5	15.3333	0.25	3	3.83333	7.66667	0.99	8.65667	-2.93333	-1.46333	-0.292667	74.9379	0.0856538	2	3	1116.4	49	114.818	115	66	558.2	2	2	49	114.818	115	66	2	1.428	1.44	54	3.263	-2.875	In
84	88	InIn.O3	100	4	277.633	2	3	1.78	3.56	1.18667	3	49	3	5	15.3333	0.25	3	3.83333	7.66667	0.99	8.65667	-2.93333	-1.46333	-0.292667	74.9379	0.0856538	2	3	1116.4	49	114.818	115	66	558.2	2	2	49	114.818	115	66	2	1.428	1.44	54	3.263	-3	In
85	89	InIn.O3	100	5	277.633	2	3	1.78	3.56	1.18667	3	49	3	5	15.3333	0.25	3	3.83333	7.66667	0.99	8.65667	-2.93333	-1.46333	-0.292667	74.9379	0.0856538	2	3	1116.4	49	114.818	115	66	558.2	2	2	49	114.818	115	66	2	1.428	1.44	54	3.263	-3	In
86	*90	HfO2	100	6	210.488	1	2	1.3	1.3	0.65	4	72	2	6	35	0.2	4	7	7	0.66	7.66	-6.4	-4.93	-1.64333	58.6756	2.70054	1	2	530	72	178.49	178	106	530	1.3	1	72	178.49	178	106	2.16	1.6649	1.44	81	24.06	-2.8	In
87	91	HfO2	100	3	210.488	1	2	1.3	1.3	0.65	4	72	2	6	35	0.2	4	7	7	0.66	7.66	-6.4	-4.93	-1.64333	58.6756	2.70054	1	2	530	72	178.49	178	106	530	1.3	1	72	178.49	178	106	2.16	1.6649	1.44	81	24.06	-2.9	In
88	92	GdGd.O3	100	7	362.497	2	3	1.2	2.4	0.8	3	64	2	6	31	0.2	3	6.2	12.4	0.99	13.39	-5.6	-4.13	-0.826	179.292	0.682276	2	3	1182.8	64	157.25	157	93	591.4	1.1	2	64	157.25	157	93	2.54	1.9557	1.61	46.1	10.05	-3	In
89	93	FeFe.O3	100	1	159.687	2	3	1.83	3.66	1.22	3	26	2	4	12	0.333333	6	4	8	0.99	8.99	-3.4	-1.93	-0.386	80.8201	0.148996	2	3	1522	26	55.845	56	30	761	1.8	2	26	55.845	56	30	1.72	0.69455	1.17	67	13.8	-3.625	In
90	94	FeFe.O3	100	2	159.687	2	3	1.83	3.66	1.22	3	26	2	4	12	0.333333	6	4	8	0.99	8.99	-3.4	-1.93	-0.386	80.8201	0.148996	2	3	1522	26	55.845	56	30	761	1.8	2	26	55.845	56	30	1.72	0.69455	1.17	67	13.8	-3.375	In
91	95	FeFe.O3	100	3	159.687	2	3	1.83	3.66	1.22	3	26	2	4	12	0.333333	6	4	8	0.99	8.99	-3.4	-1.93	-0.386	80.8201	0.148996	2	3	1522	26	55.845	56	30	761	1.8	2	26	55.845	56	30	1.72	0.69455	1.17	67	13.8	-4.125	In
92	96	CuO	100	5	79.545	1	1	1.9	1.9	1.9	2	29	1	4	28	0.333333	4	9.33333	9.33333	0.33	9.66333	-9.03333	-7.56333	-3.78167	93.38	14.301	1	1	743.5	29	63.546	64	35	743.5	1.9	1	29	63.546	64	35	1.57	1.1855	1.17	34	13.05	-3	In
93	98	CrCr.O3	100	6	151.989	2	3	1.66	3.32	1.10667	3	24	1	4	23	0.333333	6	7.66667	15.3333	0.99	16.3233	-7.36667	-5.89667	-1.17933	266.451	1.39083	2	3	1302.2	24	51.996	52	28	651.1	1.6	2	24	51.996	52	28	1.85	0.32333	1.18	170	16.9	-4	In
94	*99	CoCo.Co.O4	100	3	240.796	3	4	1.88	5.64	1.41	2.66667	27	2	4	12.5	0.333333	5	4.16667	12.5	1.32	13.82	-3.56667	-2.09667	-0.299524	190.992	0.0897145	3	4	2271	27	58.933	59	32	757	1.8	3	27	58.933	59	32	1.67	1.0994	1.16	38.7	16.19	-4	In
95	100	CoCo.Co.O4	100	4	240.796	3	4	1.88	5.64	1.41	2.66667	27	2	4	12.5	0.333333	5	4.16667	12.5	1.32	13.82	-3.56667	-2.09667	-0.299524	190.992	0.0897145	3	4	2271	27	58.933	59	32	757	1.8	3	27	58.933	59	32	1.67	1.0994	1.16	38.7	16.19	-4	In
96	101	CeO2	100	3	172.114	1	2	1.12	1.12	0.56	4	58	2	6	28	0.2	4	5.6	5.6	0.66	6.26	-5	-3.53	-1.17667	39.1876	1.38454	1	2	526.8	58	140.12	140	82	526.8	1.1	1	58	140.12	140	82	2.7	1.7426	1.65	41.78	5.46	-2.75	In
97	102	CeO2	100	6	172.114	1	2	1.12	1.12	0.56	4	58	2	6	28	0.2	4	5.6	5.6	0.66	6.26	-5	-3.53	-1.17667	39.1876	1.38454	1	2	526.8	58	140.12	140	82	526.8	1.1	1	58	140.12	140	82	2.7	1.7426	1.65	41.78	5.46	-2.875	In
98	*103	CeO2	50	7	172.114	1	2	1.12	1.12	0.56	4	58	2	6	28	0.2	4	5.6	5.6	0.66	6.26	-5	-3.53	-1.17667	39.1876	1.38454	1	2	526.8	58	140.12	140	82	526.8	1.1	1	58	140.12	140	82	2.7	1.7426	1.65	41.78	5.46	-3	In
99	*104	ZrO2	50	7	123.222	1	2	1.33	1.33	0.665	4	40	2	5	19	0.25	4	4.75	4.75	0.66	5.41	-4.15	-2.68	-0.893333	29.2681	0.798044	1	2	669	40	91.224	91	51	669	1.2	1	40	91.224	91	51	2.16	0.8509	1.57	80	16.9	-3	In
100	*105	YbYb.OO3	50	1	394.08	2	3	1.1	2.2	0.733333	3	70	2	6	34	0.2	3	6.8	13.6	0.99	14.59	-6.2	-4.73	-0.946	212.868	0.894916	2	3	1204.8	70	173.05	173	103	602.4	1.1	2	70	173.05	173	103	2.4	2.152	1.74	50.3	7.66	-2.875	In
101	106	YbYb.O3	50	2	394.08	2	3	1.1	2.2	0.733333	3	70	2	6	34	0.2	3	6.8	13.6	0.99	14.59	-6.2	-4.73	-0.946	212.868	0.894916	2	3	1204.8	70	173.05	173	103	602.4	1.1	2	70	173.05	173	103	2.4	2.152	1.74	50.3	7.66	-3	In
102	107	YbYb.OO4	50	7	394.08	2	3	1.1	2.2	0.733333	3	70	2	6	34	0.2	3	6.8	13.6	0.99	14.59	-6.2	-4.73	-0.946	212.868	0.894916	2	3	1204.8	70	173.05	173	103	602.4	1.1	2	70	173.05	173	103	2.4	2.152	1.74	50.3	7.66	-2.875	In
103	108	YY.O3	50	3	225.809	2	3	1.22	2.44	0.813333	3	39	2	5	18.5	0.25	3	4.625	9.25	0.99	10.24	-4.025	-2.555	-0.511	104.858	0.261121	2	3	1252	39	88.9058	89	50	626	1.2	2	39	88.9058	89	50	2.27	1.1057	1.62	48	11.4	-3	In
104	109	YY.O3	50	4	225.809	2	3	1.22	2.44	0.813333	3	39	2	5	18.5	0.25	3	4.625	9.25	0.99	10.24	-4.025	-2.555	-0.511	104.858	0.261121	2	3	1252	39	88.9058	89	50	626	1.2	2	39	88.9058	89	50	2.27	1.1057	1.62	48	11.4	-2.75	In
105	110	YY.O3	50	5	225.809	2	3	1.22	2.44	0.813333	3	39	2	5	18.5	0.25	3	4.625	9.25	0.99	10.24	-4.025	-2.555	-0.511	104.858	0.261121	2	3	1252	39	88.9058	89	50	626	1.2	2	39	88.9058	89	50	2.27	1.1057	1.62	48	11.4	-3	In
106	111	YY.O3	50	6	225.809	2	3	1.22	2.44	0.813333	3	39	2	5	18.5	0.25	3	4.625	9.25	0.99	10.24	-4.025	-2.555	-0.511	104.858	0.261121	2	3	1252	39	88.9058	89	50	626	1.2	2	39	88.9058	89	50	2.27	1.1057	1.62	48	11.4	-2.875	In
107	112	WO3	50	7	231.84	1	3	2.36	2.36	0.786667	6	74	2	6	36	0.2	6	7.2	7.2	0.99	8.19	-6.6	-5.13	-1.2825	67.0761	1.64481	1	3	768.6	74	183.84	184	110	768.6	1.7	1	74	183.84	184	110	2.02	1.1432	1.3	140	35.4	-2.75	In
108	113	SnO2	50	4	150.708	1	2	1.96	1.96	0.98	4	50	4	5	11.5	0.25	4	2.875	2.875	0.66	3.535	-1.675	-0.205	-0.0683333	12.4962	0.00466944	1	2	708.4	50	118.71	119	69	708.4	1.8	1	50	118.71	119	69	1.72	1.1071	1.41	83.5	7.029	-3.125	In
109	114	SnO2	50	5	150.708	1	2	1.96	1.96	0.98	4	50	4	5	11.5	0.25	4	2.875	2.875	0.66	3.535	-1.675	-0.205	-0.0683333	12.4962	0.00466944	1	2	708.4	50	118.71	119	69	708.4	1.8	1	50	118.71	119	69	1.72	1.1071	1.41	83.5	7.029	-3	In
110	115	SnO2	50	6	150.708	1	2	1.96	1.96	0.98	4	50	4	5	11.5	0.25	4	2.875	2.875	0.66	3.535	-1.675	-0.205	-0.0683333	12.4962	0.00466944	1	2	708.4	50	118.71	119	69	708.4	1.8	1	50	118.71	119	69	1.72	1.1071	1.41	83.5	7.029	-3	In
111	116	SnO2	50	7	150.708	1	2	1.96	1.96	0.98	4	50	4	5	11.5	0.25	4	2.875	2.875	0.66	3.535	-1.675	-0.205	-0.0683333	12.4962	0.00466944	1	2	708.4	50	118.71	119	69	708.4	1.8	1	50	118.71	119	69	1.72	1.1071	1.41	83.5	7.029	-3.125	In
112	117	SiO2	50	1	60.083	1	2	1.9	1.9	0.95	4	14	4	3	2.5	0.5	4	1.25	1.25	0.66	1.91	-0.05	1.42	0.473333	3.6481	0.224044	0	2	0	0	0	0	0	0	0	1	14	28.085	28	14	1.46	0.26197	1.11	144	50.55	-3.5	In
113	*118	SiO2	50	5	60.083	1	2	1.9	1.9	0.95	4	14	4	3	2.5	0.5	4	1.25	1.25	0.66	1.91	-0.05	1.42	0.473333	3.6481	0.224044	0	2	0	0	0	0	0	0	0	1	14	28.085	28	14	1.46	0.26197	1.11	144	50.55	-3.25	In
114	119	SbSb.O3	50	2	291.517	2	3	2.05	4.1	1.36667	3	51	5	5	9.2	0.25	5	2.3	4.6	0.99	5.59	-0.8	0.67	0.134	31.2481	0.017956	2	3	1078	57	138.91	139	82	539	1.1	2	57	138.91	139	82	2.74	1.7275	1.69	40.71	6.2	-3.5	In
115	120	MnO3	50	5	86.94	1	2	1.55	1.55	0.775	4	25	2	4	11.5	0.333333	7	3.83333	3.83333	0.66	4.49333	-3.23333	-1.76333	-0.587778	20.19	0.345483	2	3	1432	25	54.938	55	30	716	1.5	2	25	54.938	55	30	1.79	0.2928	1.17	220	12.05	-3	In
116	121	LaLa.O3	50	2	325.808	2	3	1.1	2.2	0.733333	3	57	2	6	27.5	0.2	3	5.5	11	0.99	11.99	-4.9	-3.43	-0.686	143.76	0.470596	2	3	1078	57	138.91	139	82	539	1.1	2	57	138.91	139	82	2.74	1.7275	1.69	40.71	6.2	-4.15	In
117	122	LaLa.O3	50	3	325.808	2	3	1.1	2.2	0.733333	3	57	2	6	27.5	0.2	3	5.5	11	0.99	11.99	-4.9	-3.43	-0.686	143.76	0.470596	2	3	1078	57	138.91	139	82	539	1.1	2	57	138.91	139	82	2.74	1.7275	1.69	40.71	6.2	-3.675	In
118	123	LaLa.O3	50	6	325.808	2	3	1.1	2.2	0.733333	3	57	2	6	27.5	0.2	3	5.5	11	0.99	11.99	-4.9	-3.43	-0.686	143.76	0.470596	2	3	1078	57	138.91	139	82	539	1.1	2	57	138.91	139	82	2.74	1.7275	1.69	40.71	6.2	-3.125	In
119	124	LaLa.O3	50	7	325.808	2	3	1.1	2.2	0.733333	3	57	2	6	27.5	0.2	3	5.5	11	0.99	11.99	-4.9	-3.43	-0.686	143.76	0.470596	2	3	1078	57	138.91	139	82	539	1.1	2	57	138.91	139	82	2.74	1.7275	1.69	40.71	6.2	-2.875	In
120	125	InIn.O3	50	2	277.633	2	3	1.78	3.56	1.18667	3	49	3	5	15.3333	0.25	3	3.83333	7.66667	0.99	8.65667	-2.93333	-1.46333	-0.292667	74.9379	0.0856538	2	3	1116.4	49	114.818	115	66	558.2	2	2	49	114.818	115	66	2	1.428	1.44	54	3.263	-2.875	In
121	*126	InIn.O3	50	3	277.633	2	3	1.78	3.56	1.18667	3	49	3	5	15.3333	0.25	3	3.83333	7.66667	0.99	8.65667	-2.93333	-1.46333	-0.292667	74.9379	0.0856538	2	3	1116.4	49	114.818	115	66	558.2	2	2	49	114.818	115	66	2	1.428	1.44	54	3.263	-3	In
122	127	InIn.O3	50	4	277.633	2	3	1.78	3.56	1.18667	3	49	3	5	15.3333	0.25	3	3.83333	7.66667	0.99	8.65667	-2.93333	-1.46333	-0.292667	74.9379	0.0856538	2	3	1116.4	49	114.818	115	66	558.2	2	2	49	114.818	115	66	2	1.428	1.44	54	3.263	-2.875	In
123	128	InIn.O3	50	5	277.633	2	3	1.78	3.56	1.18667	3	49	3	5	15.3333	0.25	3	3.83333	7.66667	0.99	8.65667	-2.93333	-1.46333	-0.292667	74.9379	0.0856538	2	3	1116.4	49	114.818	115	66	558.2	2	2	49	114.818	115	66	2	1.428	1.44	54	3.263	-3.125	In
124	129	InIn.O3	50	6	277.633	2	3	1.78	3.56	1.18667	3	49	3	5	15.3333	0.25	3	3.83333	7.66667	0.99	8.65667	-2.93333	-1.46333	-0.292667	74.9379	0.0856538	2	3	1116.4	49	114.818	115	66	558.2	2	2	49	114.818	115	66	2	1.428	1.44	54	3.263	-3.175	In
125	130	HfO2	50	1	210.488	1	2	1.3	1.3	0.65	4	72	2	6	35	0.2	4	7	7	0.66	7.66	-6.4	-4.93	-1.64333	58.6756	2.70054	1	2	530	72	178.49	178	106	530	1.3	1	72	178.49	178	106	2.16	1.6649	1.44	81	24.06	-2.75	In
126	*131	GdGd.O3	50	7	362.497	2	3	1.2	2.4	0.8	3	64	2	6	31	0.2	3	6.2	12.4	0.99	13.39	-5.6	-4.13	-0.826	179.292	0.682276	2	3	1182.8	64	157.25	157	93	591.4	1.1	2	64	157.25	157	93	2.54	1.9557	1.61	46.1	10.05	-3.525	In
127	132	FeFe.Fe.O4	50	7	231.531	3	3	1.83	5.49	1.3725	2.66667	26	2	4	12	0.333333	6	4	12	1.32	13.32	-3.4	-1.93	-0.275714	177.422	0.0760184	3	4	2283	26	55.845	56	30	761	1.8	3	26	55.845	56	30	1.72	0.69455	1.32	67	13.8	-2.625	In
128	133	CoCo.Co..O4	50	4	240.796	3	4	1.88	5.64	1.41	2.66667	27	2	4	12.5	0.333333	5	4.16667	12.5	1.32	13.82	-3.56667	-2.09667	-0.299524	190.992	0.0897145	3	4	2271	27	58.933	59	32	757	1.8	3	27	58.933	59	32	1.67	1.0994	1.16	38.7	16.19	-3.875	In
129	134	CeO2	50	2	172.114	1	2	1.12	1.12	0.56	4	58	2	6	28	0.2	4	5.6	5.6	0.66	6.26	-5	-3.53	-1.17667	39.1876	1.38454	1	2	526.8	58	140.12	140	82	526.8	1.1	1	58	140.12	140	82	2.7	1.7426	1.65	41.78	5.46	-2.875	In
130	135	CeO2	50	3	172.114	1	2	1.12	1.12	0.56	4	58	2	6	28	0.2	4	5.6	5.6	0.66	6.26	-5	-3.53	-1.17667	39.1876	1.38454	1	2	526.8	58	140.12	140	82	526.8	1.1	1	58	140.12	140	82	2.7	1.7426	1.65	41.78	5.46	-2.75	In
131	136	CeO2	50	7	172.114	1	2	1.12	1.12	0.56	4	58	2	6	28	0.2	4	5.6	5.6	0.66	6.26	-5	-3.53	-1.17667	39.1876	1.38454	1	2	526.8	58	140.12	140	82	526.8	1.1	1	58	140.12	140	82	2.7	1.7426	1.65	41.78	5.46	-3	In
132	137	AlAlO3	50	2	101.96	2	3	1.61	3.22	1.07333	3	13	3	3	3.33333	0.5	3	1.66667	3.33333	0.99	4.32333	-0.766667	0.703333	0.140667	18.6912	0.0197871	2	3	1154.8	13	26.982	27	14	577.4	1.5	2	13	26.982	27	14	1.82	0.33556	1.18	80.7	10.79	-2.875	In

## Sheet: External set
SL NO	METAL OXIDES	Mol_wt	Nmetal	Noxygen	χ	∑χ	∑χ/nO	χox	Z_metal	Zv_metal	PN_metal	(Z-Zv)/Zv_metal	Valence	Metal alpha	tot_metal_alpha	tot_oxygen_alpha	sum aplha	metal_epsilon	sum_epsilon	sum_epsilon/N	squared_sum alpha	sq_sum_epsilon/N	D1_Metals	D2_SemiMetals	D3_HeteroNonMetals	Metals_SumIP	SemiMetals_SumIP	Electrons_ActiveM	AtWt_ActiveM	MassNo_ActiveM	Neutons_ActiveM	IP_ActivM	X_ActivM	Electrons_Activ_SM	AtWt_Activ_SM	MassNo_Activ_SM	Neutons_Activ_SM	IP_Activ_SM	X_Activ_SM	VWR_Activ_SM	Electrons_Activ_NM	SuM_Active_M_SM	SuMElectrons_Active_M_SM	SuMAtWt_Active_M_SM	SuMMassNo_Active_M_SM	SuMNeutons_Active_M_SM	atomic radius	eletrochemical equivalent	covalent radius
1	Ag2O	231.74	2	1	1.93	3.86	3.86	1	47	1	5	46	4	11.5	23	0.33	23.33	-11.2	-9.73	-3.24333	544.289	10.5192	1	0	1	758	0	47	107.868	108	61	758	1.9	0	0	0	0	0	0	0	8	1	47	107.868	108	61	1.75	4.0246	1.34
2	Au2O	409.93	2	1	2.54	5.08	5.08	1	79	1	6	78	5	15.6	31.2	0.33	31.53	-15.3	-13.83	-4.61	994.141	21.2521	2	0	1	1776	0	79	196.97	197	118	888	2.4	0	0	0	0	0	0	0	8	2	79	196.97	197	118	1.79	2.4496	1.34
3	Au2O3	441.93	2	3	2.54	5.08	1.69333	3	79	1	6	78	5	15.6	31.2	0.99	32.19	-15.3	-13.83	-2.766	1036.2	7.65076	2	0	3	1776	0	79	196.97	197	118	888	2.4	0	0	0	0	0	0	0	8	2	79	196.97	197	118	1.79	2.4496	1.34
4	BaO	153.33	1	1	0.89	0.89	0.89	2	56	2	6	27	2	5.4	5.4	0.33	5.73	-4.8	-3.33	-1.665	32.8329	2.77223	1	0	1	502.7	0	56	137.33	137	81	502.7	0.9	0	0	0	0	0	0	0	8	1	56	137.33	137	81	2.78	2.5621	1.98
5	BeO	25.01	1	1	1.57	1.57	1.57	2	4	2	2	1	2	1	1	0.33	1.33	-0.4	1.07	0.535	1.7689	0.286225	1	0	1	899.2	0	4	9.0122	9	5	899.2	1.5	0	0	0	0	0	0	0	8	1	4	9.0122	9	5	1.4	0.16812	0.9
6	CaO	56.08	1	1	1	1	1	2	20	2	4	9	2	3	3	0.33	3.33	-2.4	-0.93	-0.465	11.0889	0.216225	1	0	1	589.6	0	20	40.078	40	20	589.6	1	0	0	0	0	0	0	0	8	1	20	40.078	40	20	2.23	0.7477	1.74
7	CdO	128.41	1	1	1.69	1.69	1.69	2	48	2	5	23	2	5.75	5.75	0.33	6.08	-5.15	-3.68	-1.84	36.9664	3.3856	1	0	1	866	0	48	112.414	112	64	866	1.7	0	0	0	0	0	0	0	8	1	48	112.414	112	64	1.71	2.097	1.48
8	Co2O3	165.86	2	3	1.88	3.76	1.25333	3	27	2	4	12.5	6	4.16667	8.33333	0.99	9.32333	-3.56667	-2.09667	-0.419333	86.9245	0.17584	2	0	3	1514	0	27	58.933	59	32	757	1.8	0	0	0	0	0	0	0	8	2	27	58.933	59	32	1.67	1.0994	1.16
9	CoO	74.932	1	1	1.88	1.88	1.88	2	27	2	4	12.5	5	4.16667	4.16667	0.33	4.49667	-3.56667	-2.09667	-1.04833	20.22	1.099	1	0	1	757	0	27	58.933	59	32	757	1.8	0	0	0	0	0	0	0	8	1	27	58.933	59	32	1.67	1.0994	1.16
10	CuO	79.545	1	1	1.9	1.9	1.9	2	29	1	4	28	4	9.33333	9.33333	0.33	9.66333	-9.03333	-7.56333	-3.78167	93.38	14.301	1	0	1	743.5	0	29	63.546	64	35	743.5	1.9	0	0	0	0	0	0	0	8	1	29	63.546	64	35	1.57	1.1855	1.17
11	Dy2O3	372.998	2	3	1.22	2.44	0.813333	3	66	3	6	21	3	3.5	7	0.99	7.99	-2.6	-0.79	-0.158	12.25	0.12482	2	0	3	1142.4	0	66	162.5	163	97	571.2	1.2	0	0	0	0	0	0	0	8	2	66	162.5	163	97	2.49	2.021	1.59
12	Er2O3	382.56	2	3	1.24	2.48	0.826667	3	68	3	6	21.6667	3	3.61111	7.22222	0.99	8.21222	-2.71111	-1.01222	-0.202444	13.0401	0.204919	2	0	3	1175.2	0	68	167.26	167	99	587.6	1.2	0	0	0	0	0	0	0	8	2	68	167.26	167	99	2.45	2.0802	1.57
13	Eu2O3	351.926	2	3	1.2	2.4	0.8	3	63	2	6	30.5	3	5.08333	10.1667	0.99	11.1567	-4.48333	-4.55667	-0.911333	25.8403	4.15264	2	0	3	1175.2	0	63	151.96	152	89	587.6	1.2	0	0	0	0	0	0	0	8	2	63	151.96	152	89	2.56	1.8899	1.85
14	Fe3O4	231.531	3	4	1.83	5.49	1.3725	2.66667	26	2	4	12	6	4	12	1.32	13.32	-3.4	-1.93	-0.275714	177.422	0.0760184	3	0	4	2283	0	26	55.845	56	30	761	1.8	0	0	0	0	0	0	0	8	3	26	55.845	56	30	1.72	0.69455	1.17
15	Ga2O3	187.44	2	3	1.81	3.62	1.20667	3	31	3	4	9.33333	3	3.11111	6.22222	0.99	7.21222	-2.21111	-0.741111	-0.148222	52.0161	0.0219698	2	0	3	1157.2	0	31	69.723	70	39	578.6	1.81	0	0	0	0	0	0	0	8	2	31	69.723	70	39	1.81	0.8671	1.26
16	GeO2	104.64	1	2	2.01	2.01	1.005	4	32	4	4	7	4	2.33333	2.33333	0.66	2.99333	-1.13333	0.336667	0.112222	8.96004	0.0125938	0	1	2	0	761.2	0	0	0	0	0	0	32	72.63	73	41	761.2	1.8	0.137	8	1	32	72.63	73	41	1.52	0.6771	1.22
17	HgO	216.59	1	1	2	2	2	2	80	2	6	39	4	7.8	7.8	0.33	8.13	-7.2	-5.73	-2.865	66.0969	8.20823	1	0	1	1004.6	0	80	200.59	201	121	1004.6	1.9	0	0	0	0	0	0	0	8	1	80	200.59	201	121	1.76	3.742	1.49
18	Ho2O3	361.827	2	3	1.23	2.46	0.82	3	67	2	6	32.5	3	6.5	13	0.99	13.99	-5.9	-4.43	-0.886	19.6249	0.784996	2	0	2	1160	0	67	164.93	165	98	580	1.2	0	0	0	0	0	0	0	8	2	67	164.93	165	98	2.47	2.0512	1.58
19	IrO2	224.22	1	2	2.2	2.2	1.1	4	77	2	6	37.5	8	7.5	8.2	1.99	9.19	-6.9	-5.43	-1.81	84.4561	3.2761	1	0	2	886	0	77	192.22	192	115	886	2.2	0	0	0	0	0	0	0	8	1	77	192.22	192	115	1.87	1.793	1.27
20	MgO	40.3	1	1	1.31	1.31	1.31	2	12	2	3	5	2	2.5	2.5	0.33	2.83	-1.9	-0.43	-0.215	8.0089	0.046225	1	0	1	737.5	0	12	24.305	24	12	737.5	1.2	0	0	0	0	0	0	0	8	1	12	24.305	24	12	1.72	0.45341	1.36
21	Mn3O4	228.774	3	4	1.55	4.65	1.1625	7	25	2	4	11.5	7	3.83333	11.5	1.32	12.82	-3.23333	-1.76333	-0.251905	3.10934	0.063456	3	0	4	2148	0	25	54.938	55	30	716	1.5	0	0	0	0	0	0	0	8	3	25	54.938	55	30	1.79	0.29282	1.17
22	MnO2	86.94	1	2	1.55	1.55	0.775	4	25	2	4	11.5	7	3.83333	3.83333	0.66	4.49333	-3.23333	-1.76333	-0.587778	20.19	0.345483	1	0	2	716	0	25	54.938	55	30	716	1.5	0	0	0	0	0	0	0	8	1	25	54.938	55	30	1.79	0.29282	1.17
23	Mo2O3	239.88	2	3	2.16	4.32	1.44	3	42	1	5	41	6	10.25	20.5	0.99	21.49	-9.95	-8.48	-1.696	461.82	2.87642	1	0	3	651	0	42	95.95	96	54	651	1.8	0	0	0	0	0	0	0	8	1	42	95.95	96	54	2.01	0.8949	1.3
24	MoO2	127.93	1	2	2.16	2.16	1.08	6	42	1	5	41	8	10.25	10.25	0.66	10.91	-9.95	-8.48	-2.82667	71.9104	7.99004	1	0	2	651	0	42	95.95	96	54	651	1.8	0	0	0	0	0	0	0	8	1	42	95.95	96	54	2.01	0.8949	1.3
25	MoO3	143.92	1	3	2.16	2.16	0.72	6	42	1	5	41	8	10.25	10.25	0.99	11.24	-9.95	-8.48	-2.12	71.9104	4.4944	1	0	3	651	0	42	95.95	96	54	651	1.8	0	0	0	0	0	0	0	8	1	42	95.95	96	54	2.01	0.8949	1.3
26	Nb2O3	233.81	2	3	1.6	3.2	1.06667	3	41	1	5	40	5	10	20	0.99	20.99	-9.7	-8.23	-1.646	440.58	2.70932	1	0	2	652	0	41	92.9064	93	52	652	1.6	0	0	0	0	0	0	0	8	1	41	92.9064	93	52	2.08	0.69327	1.34
27	Nb2O5	265.762	2	5	1.6	3.2	0.64	5	41	1	5	40	5	10	20	1.65	21.65	-9.7	-8.23	-1.17571	67.7329	1.3823	2	0	5	1304	0	41	92.9064	93	52	652	1.6	0	0	0	0	0	0	0	8	2	41	92.9064	93	52	2.08	0.69327	1.34
28	Nd2O3	233.811	2	3	1.6	3.2	1.06667	3	41	1	5	40	5	10	20	0.99	20.99	-9.7	-8.23	-1.646	440.58	2.70932	2	0	3	1066	0	60	144.24	144	84	533	1.14	0	0	0	0	0	0	0	8	2	60	144.24	144	84	2.64	1.7939	1.64
29	Ni2O3	165.384	2	3	1.91	3.82	1.27333	3	28	2	4	13	4	4.33333	8.66667	0.99	9.65667	-3.73333	-2.26333	-0.452667	93.2512	0.204907	2	0	3	1470	0	28	58.6934	59	31	735	1.8	0	0	0	0	0	0	0	8	2	28	58.6934	59	31	1.62	1.095	1.15
30	OsO2	222.23	1	2	2.2	2.2	1.1	4	76	2	6	37	8	7.4	7.4	0.66	8.06	-6.8	-5.33	-1.77667	64.9636	3.15654	1	0	2	838	0	76	190.23	190	114	838	2.2	0	0	0	0	0	0	0	8	1	76	190.23	190	114	1.92	1.774	1.26
31	PbO	223.2	1	1	2.33	2.33	2.33	2	82	4	6	19.5	4	3.9	3.9	0.33	4.23	-2.7	-1.23	-0.615	17.8929	0.378225	1	0	1	715.4	0	82	207.2	207	125	715.4	1.8	0	0	0	0	0	0	0	8	1	82	207.2	207	125	1.81	3.865	1.47
32	PbO2	239.2	1	2	2.33	2.33	1.165	4	82	4	6	19.5	4	3.9	3.9	0.66	4.56	-2.7	-1.23	-0.41	20.7936	0.1681	1	0	2	715.4	0	82	207.2	207	125	715.4	1.8	0	0	0	0	0	0	0	8	1	82	207.2	207	125	1.81	3.865	1.47
33	PdO	122.42	1	1	2.2	2.2	2.2	2	46	18	5	1.55556	4	0.388889	0.388889	0.33	0.718889	5.01111	6.48111	3.24056	0.516801	10.5012	1	0	1	703	0	46	106.42	106	60	703	2.2	0	0	0	0	0	0	0	8	1	46	106.42	106	60	1.81	3.865	1.47
34	Pr6O11	1021.29	6	11	1.13	6.78	0.616364	4	59	2	6	28.5	3	5.7	34.2	3.63	37.83	-5.1	-3.63	-0.242	13.1769	0.058564	6	0	11	3132	0	59	140.91	141	82	522	1.1	0	0	0	0	0	0	0	8	6	59	140.91	141	82	2.67	1.7524	1.65
35	PtO	211.08	1	1	2.28	2.28	2.28	2	78	1	6	77	6	15.4	15.4	0.33	15.73	-15.1	-13.63	-6.815	247.433	46.4442	1	0	1	867	0	78	195.08	195	117	867	2.2	0	0	0	0	0	0	0	8	1	78	195.08	195	117	1.83	1.8197	1.3
36	PtO2	227.08	1	2	2.28	2.28	1.14	4	78	1	6	77	6	15.4	15.4	0.66	16.06	-15.1	-13.63	-4.54333	257.924	20.6419	1	0	2	867	0	78	195.08	195	117	867	2.2	0	0	0	0	0	0	0	8	1	78	195.08	195	117	1.83	1.8197	1.3
37	ReO2	218.21	1	2	1.9	1.9	0.95	4	75	2	6	36.5	7	7.3	7.3	0.66	7.96	-6.7	-5.23	-1.74333	63.3616	3.03921	1	0	2	759	0	75	186.21	186	111	759	1.9	0	0	0	0	0	0	0	8	1	75	186.21	186	111	1.97	0.9924	1.28
38	Rh2O3	253.81	2	3	2.28	4.56	1.52	3	45	1	5	44	6	11	22	0.99	22.99	-10.7	-9.23	-1.846	528.54	3.40772	2	0	1	1484	0	45	102.9	103	58	742	2.2	0	0	0	0	0	0	0	8	2	45	102.9	103	58	1.83	1.2798	1.25
39	RuO2	133.07	1	2	2.2	2.2	1.1	4	44	1	5	43	8	10.75	10.75	0.66	11.41	-10.45	-8.98	-2.99333	130.188	8.96004	1	0	2	722.4	0	44	101.07	101	57	722.4	2.2	0	0	0	0	0	0	0	8	1	44	101.07	101	57	1.89	1.257	1.25
40	Sc2O3	137.91	2	3	1.36	2.72	0.906667	3	21	2	4	9.5	3	3.16667	6.33333	0.99	7.32333	-2.56667	-1.09667	-0.219333	53.6312	0.0481071	2	0	1	1281	0	21	44.956	45	24	640.5	1.36	0	0	0	0	0	0	0	8	2	21	44.956	45	24	2.09	0.55914	1.44
41	Sm2O3	348.72	2	3	1.17	2.34	0.78	3	62	3	6	19.6667	3	3.27778	6.55556	0.99	7.54556	-2.37778	-0.345556	-0.0691111	10.7438	0.0238817	2	0	3	1084.6	0	62	150.36	150	88	542.3	1.2	0	0	0	0	0	0	0	8	2	62	150.36	150	88	2.59	1.87	1.62
42	SrO	103.62	1	1	0.95	0.95	0.95	2	38	2	5	18	2	4.5	4.5	0.33	4.83	-3.9	-2.43	-1.215	23.3289	1.47623	1	0	1	549.2	0	38	87.62	88	50	549.2	1	0	0	0	0	0	0	0	8	1	38	87.62	88	50	2.45	1.635	1.91
43	Ta2O3	409.89	2	3	1.5	3	1	3	73	2	6	35.5	5	7.1	14.2	0.99	15.19	-6.5	-5.03	-1.006	230.736	1.01204	2	0	3	1348.4	0	73	180.95	181	108	674.2	1.5	0	0	0	0	0	0	0	8	2	73	180.95	181	108	2.09	1.3502	1.34
44	Ta2O5	441.85	1	5	1.5	1.5	0.3	5	73	2	6	35.5	5	7.1	7.1	1.65	8.75	-6.5	-5.03	-0.718571	25.3009	0.516345	2	0	5	1348.4	0	73	180.95	181	108	674.2	1.5	0	0	0	0	0	0	0	8	2	73	180.95	181	108	2.09	1.3502	1.34
45	TcO2	130	1	2	1.9	1.9	0.95	4	43	2	5	20.5	7	5.125	5.125	0.66	5.785	-4.525	-3.055	-1.01833	33.4662	1.037	1	0	2	702	0	43	98	98	55	702	1.9	0	0	0	0	0	0	0	8	1	43	98	98	55	1.95	0.51651	1.27
46	Tl2O	424.77	2	1	1.62	3.24	3.24	1	81	3	6	26	3	5.2	10.4	0.33	10.73	-4.3	-2.83	-0.943333	115.133	0.889878	2	0	1	1178.2	0	81	204.38	204	123	589.1	1.8	0	0	0	0	0	0	0	8	2	81	204.38	204	123	2.08	7.625	1.48
47	Tl2O3	456.76	2	3	1.62	3.24	1.08	3	81	3	6	26	3	5.2	10.4	0.99	11.39	-4.3	-2.83	-0.566	129.732	0.320356	2	0	3	1178.2	0	81	204.38	204	123	589.1	1.8	0	0	0	0	0	0	0	8	2	81	204.38	204	123	2.08	7.625	1.48
48	V2O3	149.88	2	3	1.63	3.26	1.08667	3	23	2	4	10.5	5	3.5	7	0.99	7.99	-2.9	-1.43	-0.286	63.8401	0.081796	2	0	3	1298.2	0	23	50.942	51	28	649.1	1.6	0	0	0	0	0	0	0	8	2	23	50.942	51	28	1.92	0.38013	1.22
49	WO2	215.84	1	2	2.36	2.36	1.18	4	74	2	6	36	6	7.2	7.2	0.66	7.86	-6.6	-5.13	-1.71	61.7796	2.9241	1	0	2	768.6	0	74	183.84	184	110	768.6	1.7	0	0	0	0	0	0	0	8	1	74	183.84	184	110	2.02	1.1432	1.3
[truncated: 4 more columns]
